# Supplementary material for: Stigma and Its Association With Glycemic Control and Hypoglycemia in Adolescents and Young Adults With Type 1 Diabetes: Cross-Sectional Study
Source: PubMed Central journal article supplement (PMC5935805; doi:10.2196/jmir.9432), 2018-04-20
Supplement: jmir_v20i4e151_app1.pdf [file jmir_v20i4e151_app1.pdf]

**Table 1 Diabetes organisations and groups used for recruitment**

| <b>Support groups and organization</b>           | <b>About the organization</b>                                                                                 |
|--------------------------------------------------|---------------------------------------------------------------------------------------------------------------|
| Alberta Children's Hospital & transition clinics | Children's hospital in Calgary                                                                                |
| British Columbia Children's hospital             | Children's hospital in Vancouver                                                                              |
| Calgary Insulin Pumpers (Alberta)                | Support group for those interested in T1D education                                                           |
| Canadian Celiac Association                      | Dedicated to improving diagnosis and quality of life for those adversely affected by gluten                   |
| Canadian Obesity Network                         | Largest obesity association in Canada                                                                         |
| Celiac association NL & Labrador chapter         | Newfound Land chapter of the Canadian Celiac Association                                                      |
| Celiac Association of Canada Calgary             | Calgary chapter of the Canadian Celiac Association (Alberta)                                                  |
| Connected In Motion                              | T1D support group (Ontario)                                                                                   |
| Crohn's and Colitis Canada                       | National, volunteer-based charity focused on finding the cures for Crohn's disease and ulcerative colitis     |
| Diabète Québec                                   | Quebec association that wants to educate people with diabetes                                                 |
| Diabetes Canada                                  | National voice for those living with diabetes or prediabetes                                                  |
| Dskate Canada                                    | Hockey and diabetes camp (Quebec and Ontario)                                                                 |
| Hôpital Ste-Justine                              | Children's hospital in Montreal, Quebec                                                                       |
| <i>Live Well! Bien Vivre!</i>                    | Prevention & management of chronic medical conditions with the help of wellness coaches;                      |
| National Aboriginal Diabetes Association         | Trying to prevent and manage diabetes by working with people, communities and organizations                   |
| Southern Ontario Aboriginal Diabetes Initiative  | supporting Indigenous communities, families and individuals to make healthy choices and live free of diabetes |
| The Canadian Addison Society                     | Organization that wants to educate people about Addison's disease (Ontario)                                   |
| Vancouver Island Addison support group           | Vancouver chapter of the Canadian Addison Society, British Columbia                                           |
| Waltzing the dragon                              | Website's aim is to educate, equip and encourage families dealing with type 1 diabetes (Alberta)              |
| Waterloo Wellington Diabetes                     | Central intake for referrals to diabetes education & specialists, Ontario                                     |
| Young & T1                                       | T1D support group, British Columbia                                                                           |
| Athletes+causes                                  | Helps athletes do their philanthropic work to educate and instill hope in others                              |
| Beyondtype1.org                                  | Supportive community via social media                                                                         |
| ConsultantPtCare                                 | An online community bridging the gap between health care and patient care                                     |
| Diabetes Care Community                          | Network of people with diabetes and their support network involved in diabetes care                           |
| Diabetic connect                                 | World's largest online social network for people & families living w/ diabetes                                |
| T1dactiveliving                                  | Her honest personal journey with T1D in hopes of inspiring others to be strong                                |
| TheCeliacScene                                   | Your premier source for gluten-free living                                                                    |
| <i>Type 1 Diabetes Think Tank Network</i>        | This online group tries to improve the quality of life & health outcomes for people with T1D                  |
| type1diabetesproject                             | Helps people with T1D live healthier lives                                                                    |
| Type1strong                                      | Raising awareness that you can be strong & healthy even though have T1D                                       |
| Uwalk                                            | An interactive website that motivates ppl to exercise                                                         |
| Abbott Freestyle                                 | Online community committed to helping people with diabetes - run by Abbott Laboratories                       |
| Accu-Chek Canada                                 | A company that makes glucose meters                                                                           |
| Banting House                                    | Creates public awareness of the national historic significance of Sir Frederick Banting                       |
| Canadian Diabetes Care Guide                     | Digest-sized Canadian magazine written by health care professionals                                           |
| Centre for Studies in Primary Care (CSPC)        | The research arm of the Department of Family Medicine at Queen's University, Ontario                          |

|                                                  |                                                                                                                                                        |
|--------------------------------------------------|--------------------------------------------------------------------------------------------------------------------------------------------------------|
| Champlain Diabetes Services                      | Resource for people living with diabetes & for healthcare providers in the Champlain region, Ontario                                                   |
| Diabetes Care Program of Nova Scotia             | Using leadership to improve the health of those living with or at risk of developing diabetes                                                          |
| Dietitians of Canada                             | Professional association representing 6,000 members across Canada                                                                                      |
| Guelph General Hospital                          | A hospital found in Guelph, Ontario                                                                                                                    |
| Health Prince Edward Island                      | Delivers publicly funded health services                                                                                                               |
| Horizon Health network for the Maritimes         | A health network of hospitals and clinics in the Maritimes (New Brunswick)                                                                             |
| Hotel Dieu Hospital                              | Hospital in Kingston, Ontario                                                                                                                          |
| Huron Perth Diabetes Education Program           | Diabetes program offered at 7 different hospitals in the Huron-Perth, Ontario                                                                          |
| IWK Health Centre                                | Pediatric and obstetric care in the Maritime provinces (Nova Scotia)                                                                                   |
| Joseph Brant Hospital                            | A hospital found in Burlington, Ontario                                                                                                                |
| <i>Live Well! Bien Vivre!</i>                    | Wellness programs and experienced health coaches available to help pts achieve a healthier lifestyle that is funded by Diabetes Canada (New Brunswick) |
| Markham Stouffville Hosp                         | A hospital found in Markham, Ontario                                                                                                                   |
| Medavie Blue Cross                               | Not for profit Canadian medical insurance company                                                                                                      |
| Medtronics Canada                                | A company that makes insulin pumps                                                                                                                     |
| MYSUGR                                           | An application for diabetes management (USA)                                                                                                           |
| Niagara Health System                            | Found in the Niagara region, it is Ontario's largest multi-site hospital amalgamation                                                                  |
| Norfolk General Hospital                         | A general hospital in Simcoe, Ontario                                                                                                                  |
| Provincial Council for Maternal and child health | Provincial (Ontario) forum where leaders in the field can identify issues of importance in health care                                                 |
| Rouge Valley Health System                       | A hospital corporation based in the Greater Toronto area, Ontario                                                                                      |
| St. Joe's Youth Wellness Centre                  | An accessible centre in Hamilton, (Ontario) for people aged 17 to 25 to receive care for mental health and addiction issues                            |
| Stollery Children's Hospital                     | A children's hospital in Edmonton, Alberta                                                                                                             |
| Trillium Health Partners                         | A hospital system which serves Mississauga and western Toronto, Ontario                                                                                |

**Table 2 Prevalence of stigma according to different cut-points on the BDA stigma-subscale and associations with glycemic control**

| Cut-off on the 5 point likert-type BDA-stigma subscale * | Prevalence                                                       | Association with glycemic control ‡ |                                                                                 |                                                     |
|----------------------------------------------------------|------------------------------------------------------------------|-------------------------------------|---------------------------------------------------------------------------------|-----------------------------------------------------|
|                                                          | Endorsing one of the 3 most relevant items†<br><br>%<br>[95% CI] | A1C >9%<br><br>OR<br>[95% CI]       | Self-reported ≥1 severe hypoglycemia in the previous year<br><br>OR<br>[95% CI] | Poor glycemic control overall<br><br>OR<br>[95% CI] |
| Score ≥ 2                                                | 65.5%<br>[60.7-70.3]                                             | 3.05<br>[1.36-6.86]                 | 1.86<br>[1.05-3.31]                                                             | 2.25<br>[1.33-3.80]                                 |
| Score ≥ 3                                                | 44.0%<br>[38.9-49.0]                                             | 2.16<br>[1.14-4.08]                 | 1.83<br>[1.08-3.11]                                                             | 1.97<br>[1.22-3.19]                                 |
| Score ≥ 4                                                | 28.7%<br>[24.1-33.3]                                             | 1.99<br>[1.05-3.78]                 | 2.44<br>[1.40-4.24]                                                             | 2.13<br>[1.27-3.56]                                 |
| Score = 5                                                | 14.0%<br>[10.5-17.5]                                             | 2.01<br>[0.92-4.42]                 | 2.24<br>[1.10-4.57]                                                             | 2.64<br>[1.33-5.26]                                 |

\* The 5-point likert-type scale ranged from 1- not at all true to 5- completely true

† The 3 most relevant items: I try not to deal with my diabetes in front of friends. I have a hard time telling people I have diabetes. I feel embarrassed taking care of my diabetes in front of other people.

‡ Multivariate logistic regression models adjusted for age, sex at birth, type of treatment (multiple daily injection or insulin pump)

**Table 3 Self-efficacy for diabetes management**

| <b>Self-efficacy for diabetes self-management (SEDM) Items</b>                                 | <b>Being affected by stigma n=249</b> | <b>Not affected by stigma n=131</b> |                          |
|------------------------------------------------------------------------------------------------|---------------------------------------|-------------------------------------|--------------------------|
|                                                                                                | Mean score (sd)                       | Mean score (sd)                     | Mean difference [95% CI] |
| Adjust insulin when you eat more or less than usual                                            | 7.8 (2.0)                             | 8.4 (2.1)                           | 0.6 [0.2-1.0]            |
| Choose healthy foods when you go out to eat                                                    | 7.2 (2.3)                             | 7.8 (2.4)                           | 0.6 [0.1-1.1]            |
| Exercise even when you don't really feel like it                                               | 5.8 (2.9)                             | 6.9 (3.0)                           | 1.1 [0.5-1.7]            |
| Adjust insulin or food accurately based on how much exercise you get                           | 6.4 (2.6)                             | 7.4 (2.6)                           | 1.0 [0.5-1.6]            |
| Talk to your doctor or nurse about any problems you are having with taking care of my diabetes | 7.2 (2.7)                             | 8.4 (2.3)                           | 1.3 [0.7-1.8]            |
| Do your blood sugar checks even when you are really busy                                       | 6.1 (2.8)                             | 7.4 (2.6)                           | 1.2 [0.7-1.8]            |
| Manage your diabetes the way your health care team wants you to                                | 6.1 (2.6)                             | 7.1 (2.7)                           | 0.9 [0.4-1.5]            |
| Manage your diabetes even when you feel overwhelmed                                            | 6.0 (2.7)                             | 7.3 (2.6)                           | 1.4 [0.8-1.9]            |
| Find ways to deal with feeling frustrated about your diabetes                                  | 5.6 (2.7)                             | 7.1 (2.7)                           | 1.5 [0.9-2.02]           |
| Identify things that could get in the way of managing your diabetes                            | 7.2 (2.1)                             | 8.2 (2.1)                           | 0.9 [0.5-1.4]            |
| SEDM Total score                                                                               | 6.5 (1.7)                             | 7.6 (1.6)                           | 1.1 [0.7-1.4]            |

Maximal score is 10 indicative of greater self-efficacy

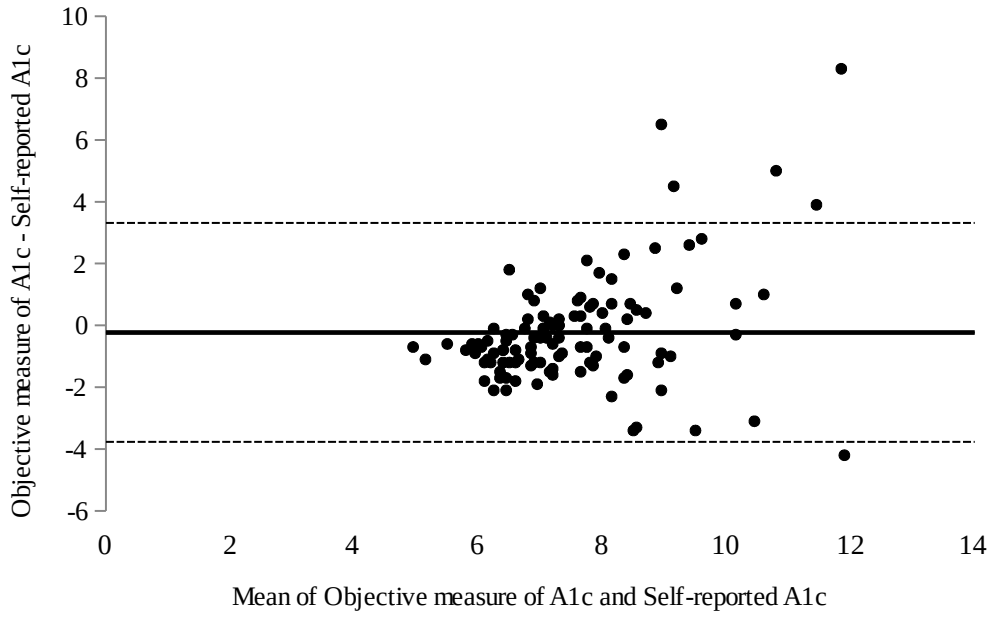

**Figure 1. Bland-Altman plot for agreement between objectively measured and self-reported A1c**
